# Supplementary material
Source: PubMed Central journal article supplement (PMC3478504)
Supplement: NIHMS411696-supplement-1_si_001.pdf [file NIHMS411696-supplement-1_si_001.pdf]

## **SUPPORTING INFORMATION**

### **Identification of Ligand Templates using Local Structure Alignment for Structure-based Drug Design**

*Hui Sun Lee\* and Wonpil Im\**

Department of Molecular Biosciences and Center for Bioinformatics, The University of  
Kansas, 2030 Becker Drive Lawrence, Kansas 66047, United States

---

\*Corresponding authors: [huisun.cadd@gmail.com](mailto:huisun.cadd@gmail.com) and [wonpil@ku.edu](mailto:wonpil@ku.edu)

**Table S1.** Structure information of the benchmark set and the best template ligand identified by G-LoSA. The best template was determined in terms of the best overlap ratio value among top 10 template ligands.

| PDB ID | chain | ligand | best template | PDB ID | chain | ligand | best template |
|--------|-------|--------|---------------|--------|-------|--------|---------------|
| 1GKC   | A     | BUM    | 2W15          | 1Q41   | A     | IXM    | 1V0O          |
| 1GPK   | A     | HUP    | 2DLC          | 1Q4G   | A     | BFL    | 1P3T          |
| 1HNN   | A     | SKF    | 3GE7          | 1R1H   | A     | BIR    | 1U4G          |
| 1HP0   | A     | AD3    | 3G5I          | 1R55   | A     | 097    | 2I47          |
| 1HQ2   | A     | PH2    | 3DS6          | 1R58   | A     | AO5    | 1QXZ          |
| 1HVY   | A     | D16    | 2GQU          | 1R90   | A     | FLP    | 1TDG          |
| 1HWW   | A     | SWA    | 2WYI          | 1S19   | A     | MC9    | 3GWX          |
| 1IA1   | A     | TQ3    | 2BLC          | 1S3V   | A     | TQD    | 3FQV          |
| 1IG3   | A     | VIB    | 3LM8          | 1SJ0   | A     | E4D    | 2W8Y          |
| 1J3J   | A     | CP6    | 3QLZ          | 1SQ5   | A     | PAU    | 2F3E          |
| 1JD0   | A     | AZM    | 3BXU          | 1SQN   | A     | NDR    | 2GPV          |
| 1JJE   | A     | BYS    | 1X8I          | 1T40   | A     | ID5    | 3HB6          |
| 1JLA   | A     | TNK    | 2A0C          | 1T46   | A     | STI    | 3HEC          |
| 1K3U   | A     | IAD    | 1WXJ          | 1TOW   | A     | CRZ    | 1EP3          |
| 1KE5   | A     | LS1    | 2GDO          | 1TT1   | A     | KAI    | 3OEN          |
| 1L2S   | A     | STC    | 3HUO          | 1U4D   | A     | DBQ    | 1ZLT          |
| 1L7F   | A     | BCZ    | 2F10          | 1UML   | A     | FR4    | 2PGR          |
| 1LPZ   | B     | CMB    | 2PKS          | 1UNL   | A     | RRC    | 3H9F          |
| 1LRH   | A     | NLA    | 1H1M          | 1UOU   | A     | CMU    | 2WIY          |
| 1M2Z   | A     | DEX    | 3HM1          | 1V0P   | A     | PVB    | 2F57          |
| 1MEH   | A     | MOA    | 1H7W          | 1V48   | A     | HA1    | 1ODI          |
| 1MMV   | A     | 3AR    | 2CU0          | 1V4S   | A     | MRK    | 2ZT9          |
| 1MZC   | B     | BNE    | 3HXF          | 1VCJ   | A     | IBA    | 1L7H          |
| 1N1M   | A     | A3M    | 3IUQ          | 1W1P   | A     | GIO    | 2A3A          |
| 1N2J   | A     | PAF    | 3GUZ          | 1W2G   | A     | THM    | 1TMK          |
| 1N2V   | A     | BDI    | 1IT8          | 1X8X   | A     | TYR    | 2DLC          |
| 1N46   | A     | PFA    | 3FAL          | 1XM6   | A     | 5RM    | 1UDT          |
| 1NAV   | A     | IH5    | 3FAL          | 1XOQ   | A     | ROF    | 2H44          |
| 1OF1   | A     | SCT    | 2VQS          | 1XOZ   | A     | CIA    | 1BGP          |
| 1OF6   | A     | DTY    | 3KW2          | 1Y6B   | A     | AAX    | 1PMQ          |
| 1OPK   | A     | P16    | 3EQR          | 1YGC   | H     | 905    | 2PKS          |
| 1OQ5   | A     | CEL    | 1X8O          | 1YQY   | A     | 915    | 2A8H          |
| 1OWE   | A     | 675    | 1T32          | 1YV3   | A     | BIT    | 2WOV          |
| 1OYT   | H     | FSN    | 8GCH          | 1YVF   | A     | PH7    | 3BEN          |
| 1P2Y   | A     | NCT    | 3DOG          | 1YWR   | A     | LI9    | 2WOT          |
| 1P62   | B     | GEO    | 2JAQ          | 1Z95   | A     | 198    | 2QH6          |
| 1PMN   | A     | 984    | 3POZ          | 2BR1   | A     | PFP    | 3K5U          |
| 1Q1G   | A     | MTI    | 3DF9          | 2BSM   | A     | BSM    | 2ZDX          |
